# Supplementary material
Source: publisher figshare collection journal article supplement (https://wiley.figshare.com/articles/dataset/_/3557265)

**Appendix B** - Bivariate relationships for GLOPNET datasets with N > 25 for which leaf lifespan data are available. For each relationship, communities are arranged from low to high variation in LLS. Correlation coefficients are given for each relationship. Community type is given for each community (> 80% herbaceous, deciduous woody, evergreen woody, or mixed).

A. LMA- $N_{\text{mass}}$  correlations, N = 21 communities

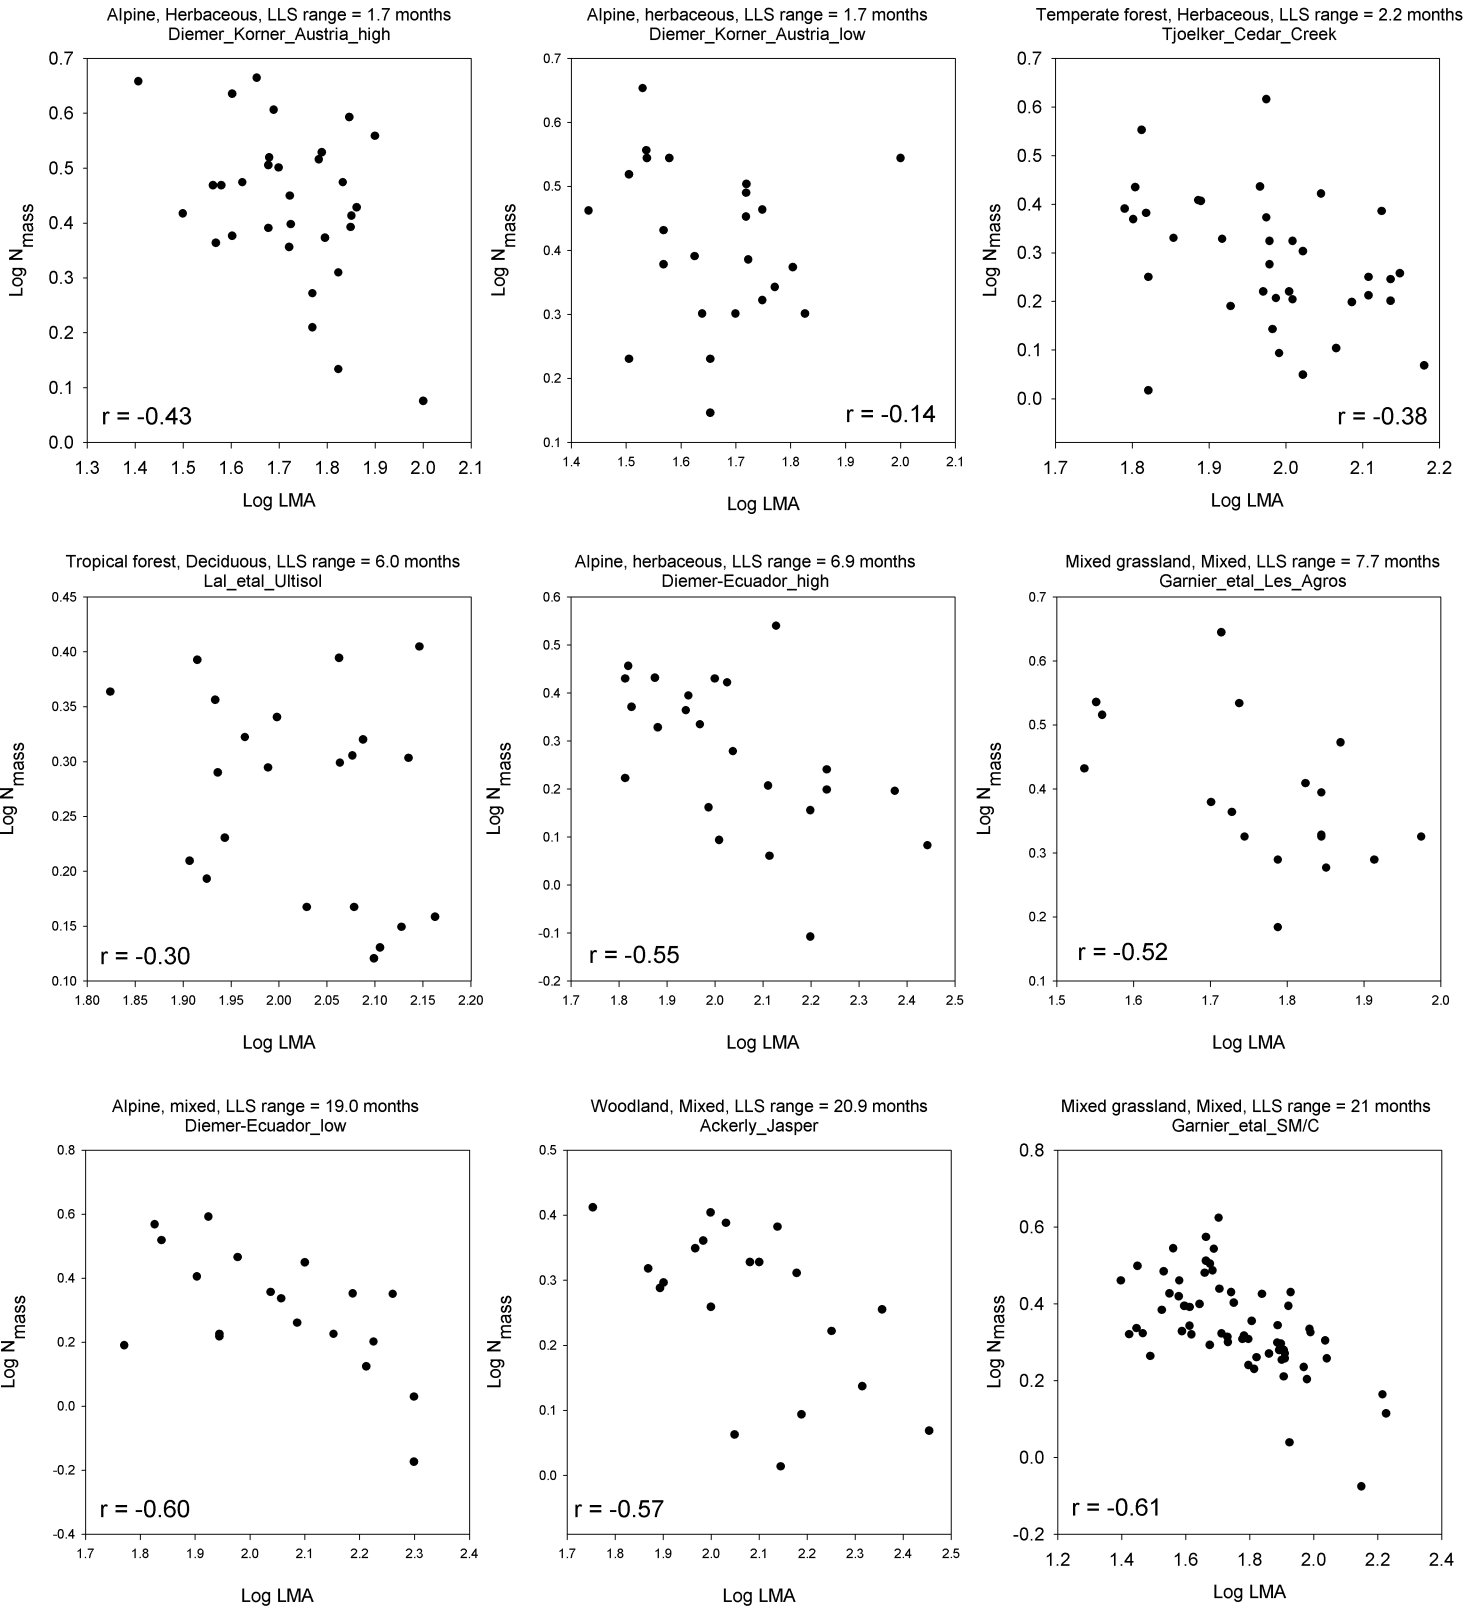

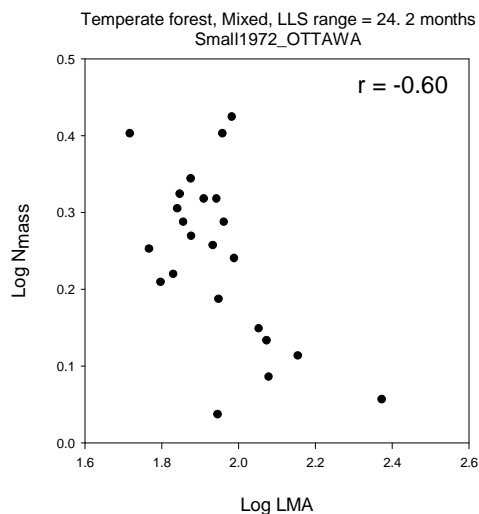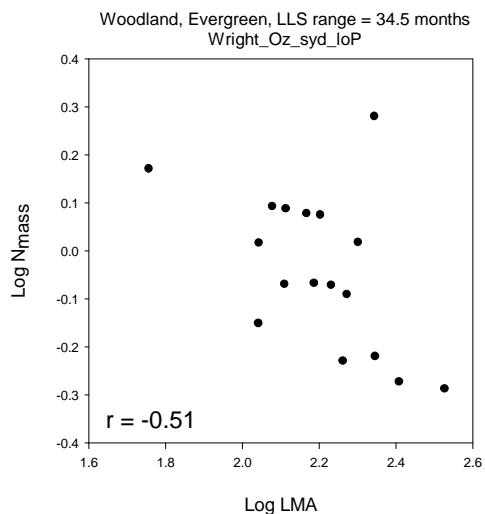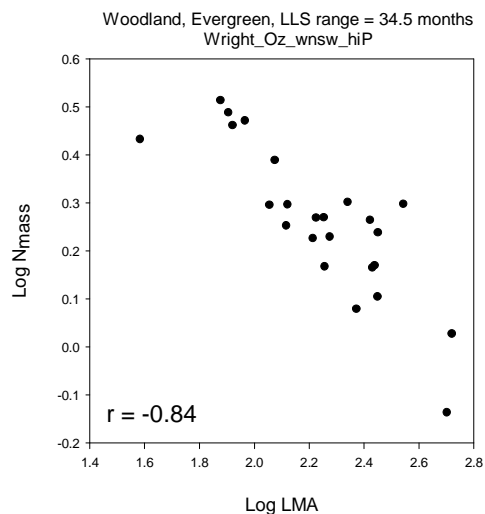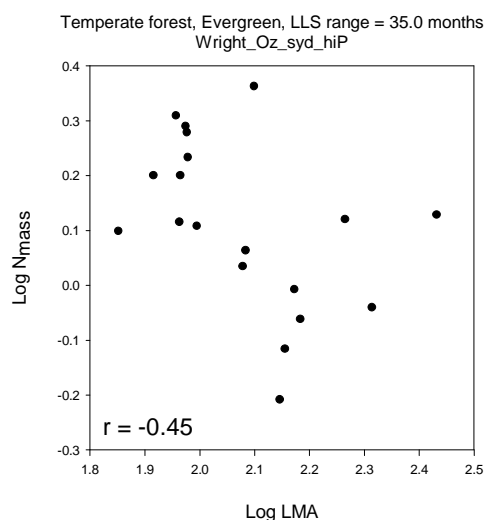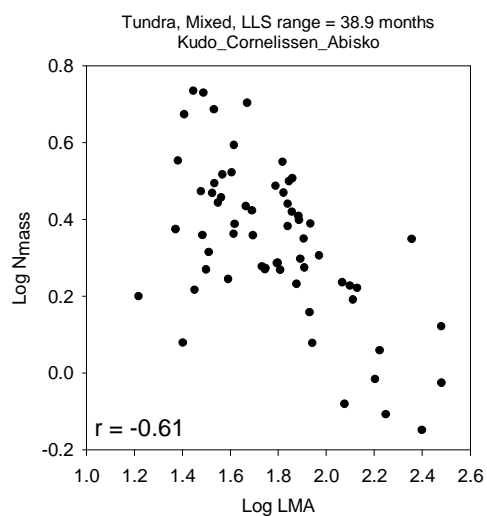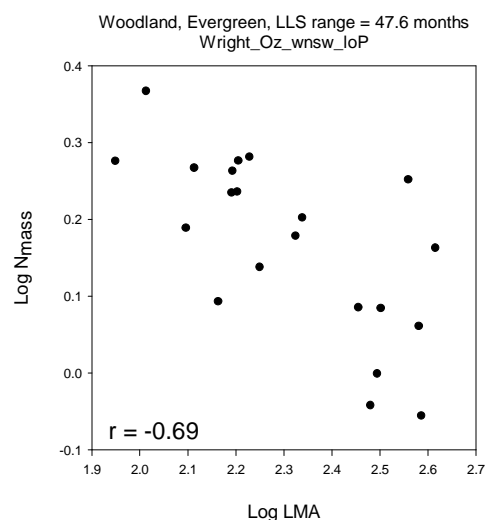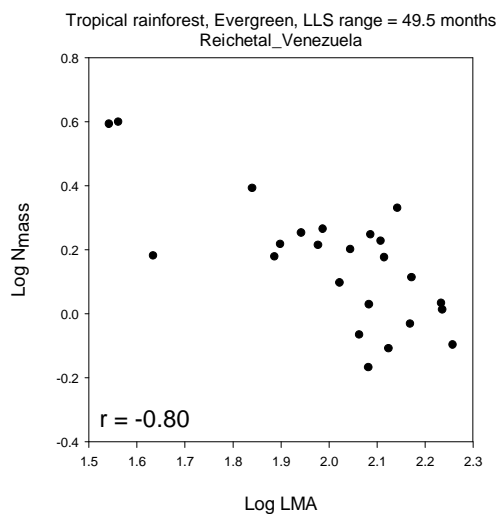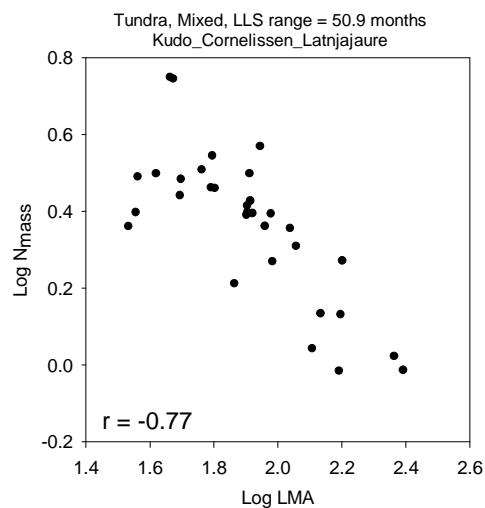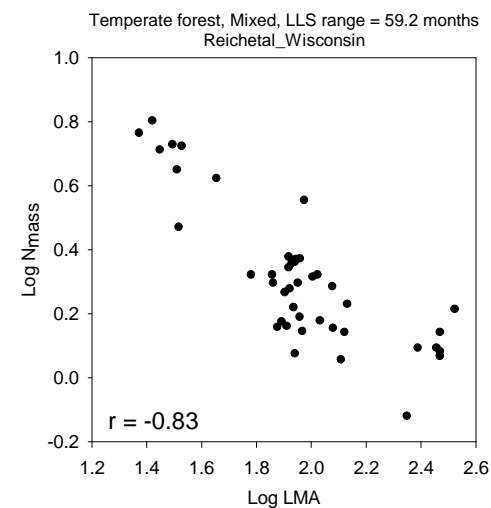

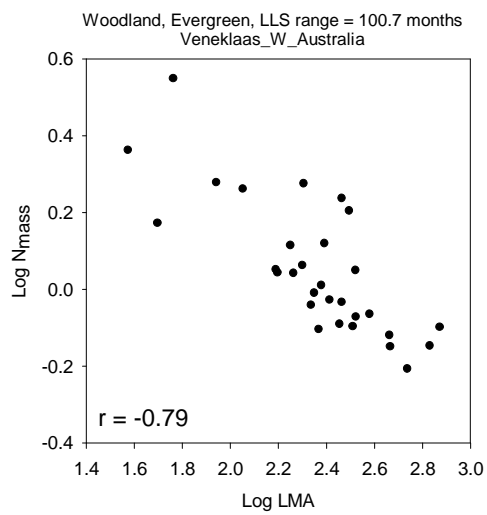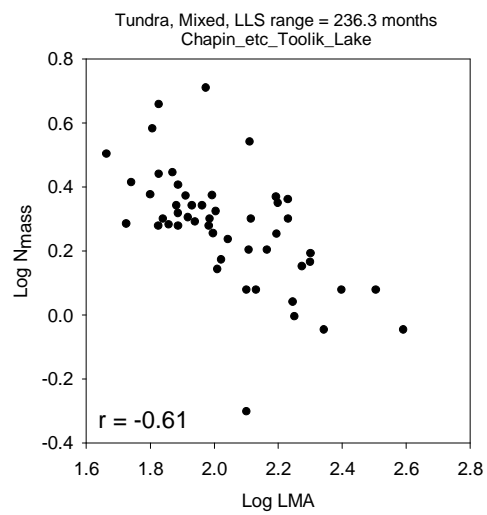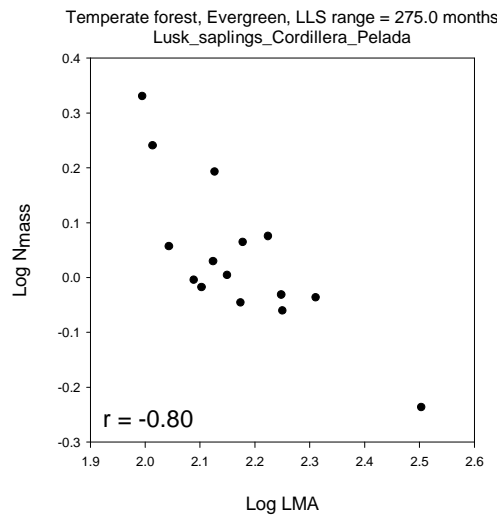

## B. $A_{\text{mass}}$ - $N_{\text{mass}}$ correlations, N = 13 communities

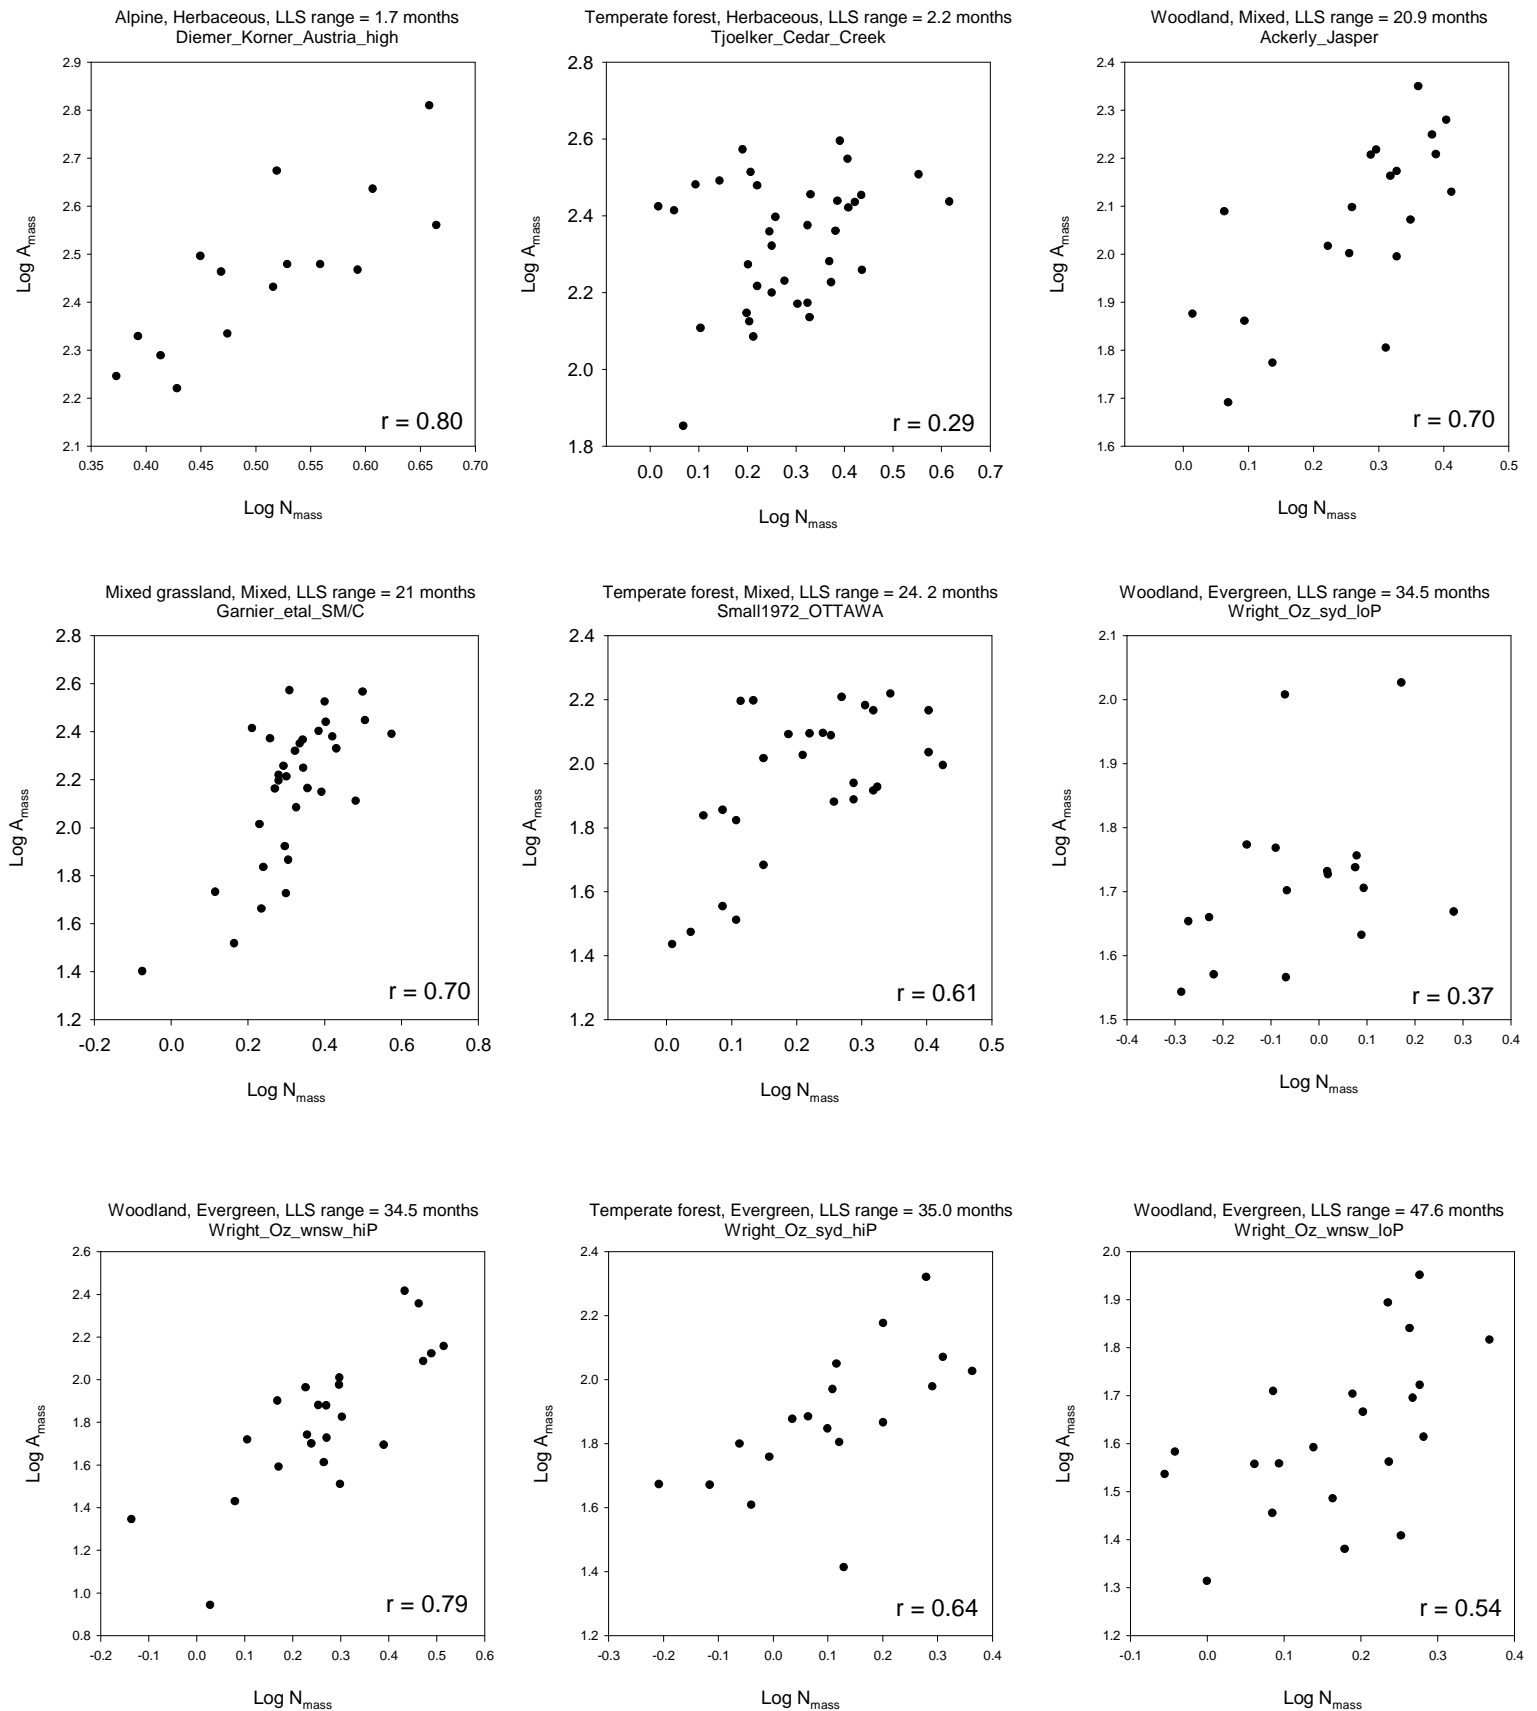

Tropical rainforest, Evergreen, LLS range = 49.5 months  
Reichetal\_Venezuela

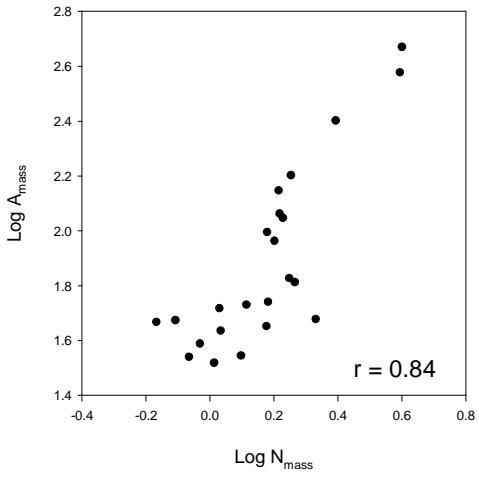

Temperate forest, Mixed, LLS range = 59.2 months  
Reichetal\_Wisconsin

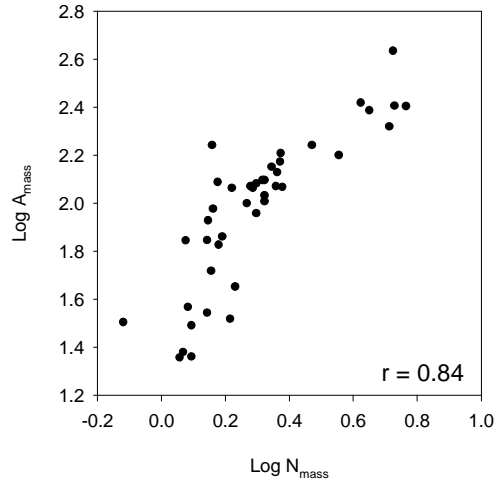

Woodland, Evergreen, LLS range = 100.7 months  
Veneklaas\_W\_Australia

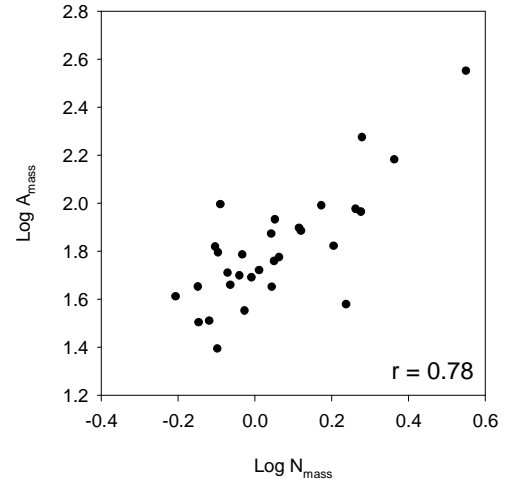

Tundra, Mixed, LLS range = 236.3 months  
Chapin\_etc\_Toolik\_Lake

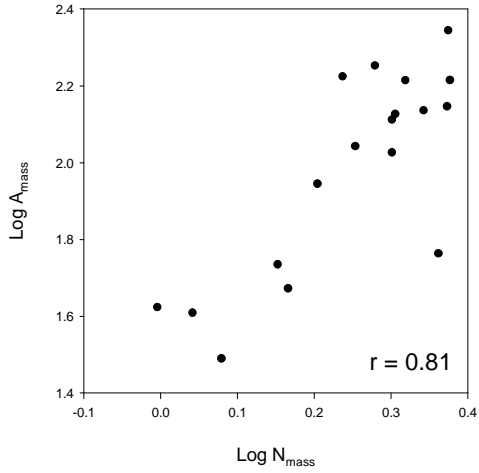

### C. LMA- $A_{\text{mass}}$ correlations, N = 14 communities

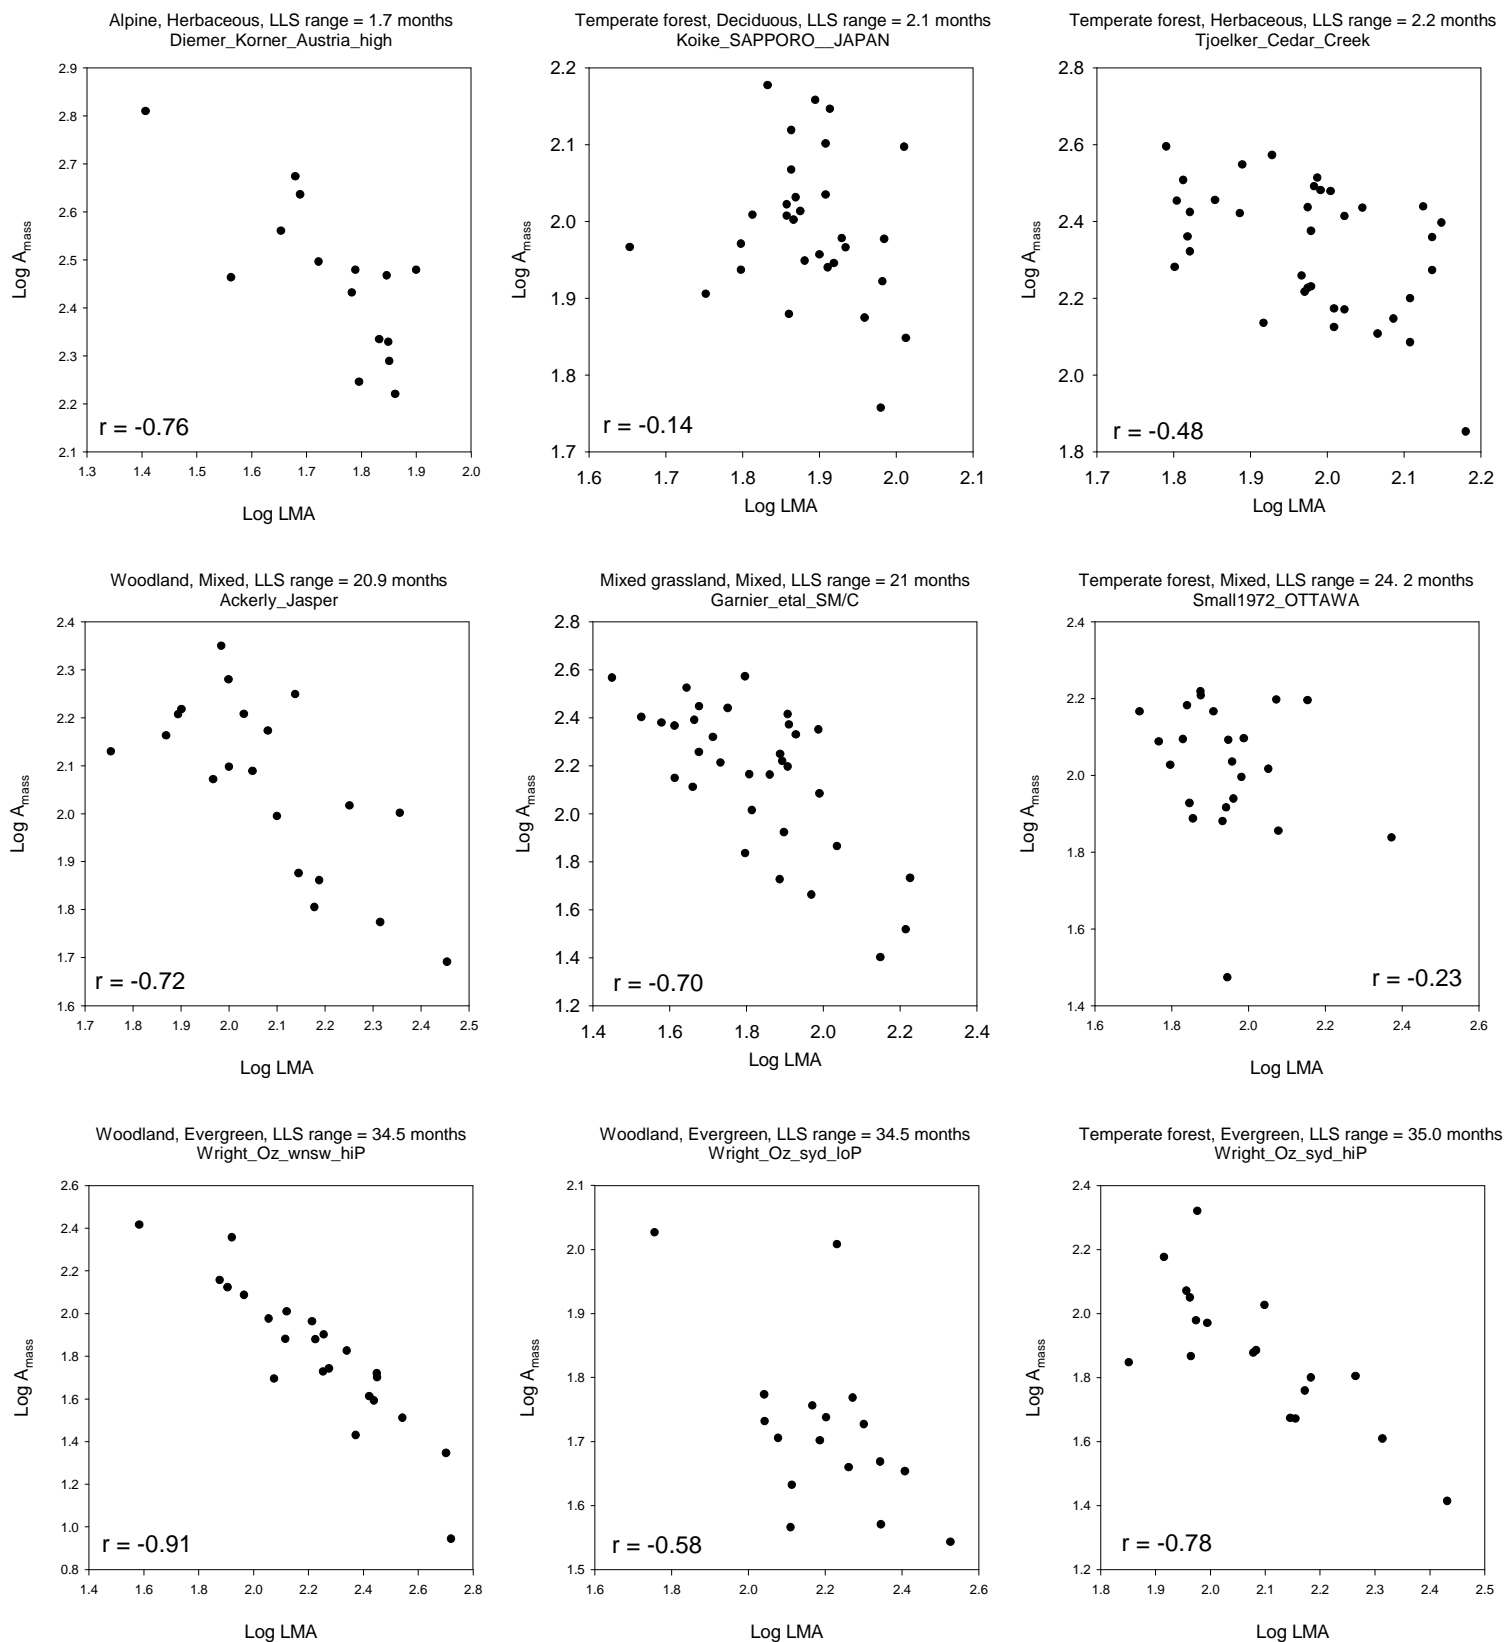

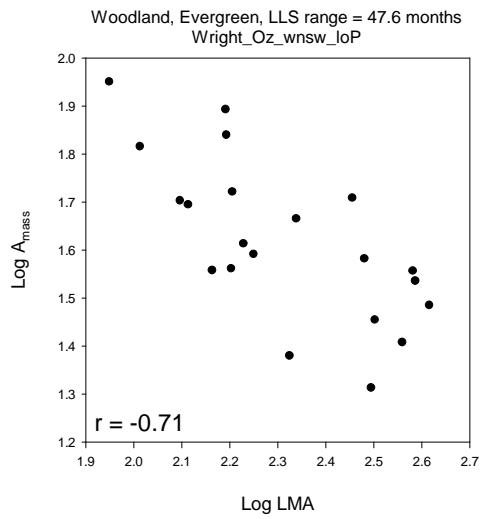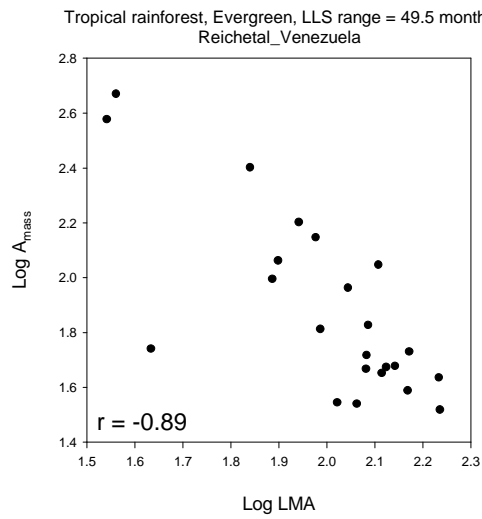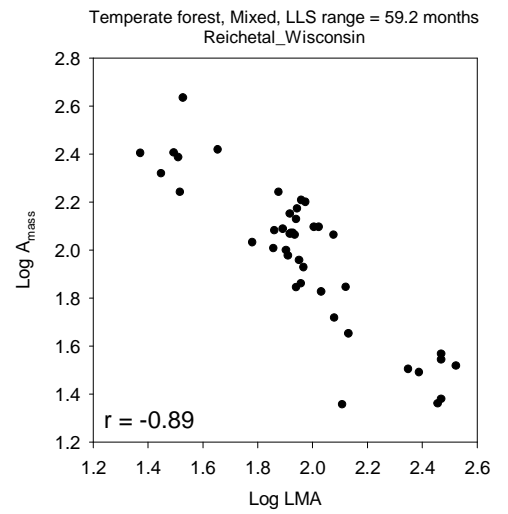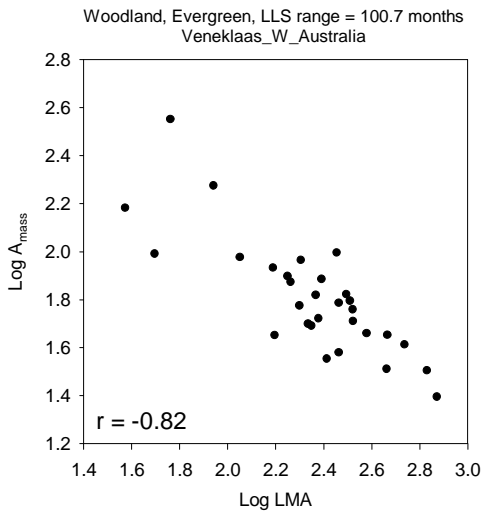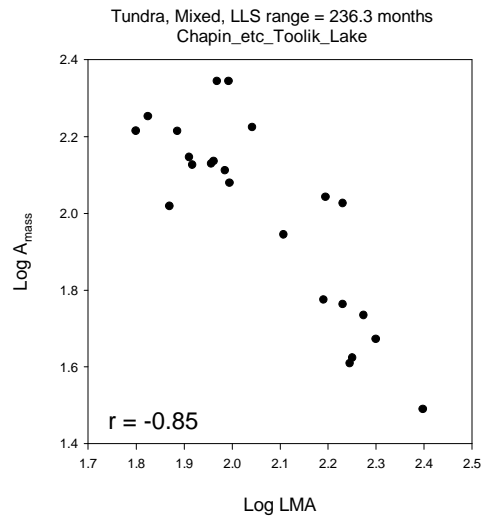

Supplement: Supplementary file 1 [file 1]
